# Supplementary material
Source: PubMed Central journal article supplement (PMC2048783)
Supplement: plntphys_pp.107.105189_1.pdf [file plntphys_pp.107.105189_1.pdf]

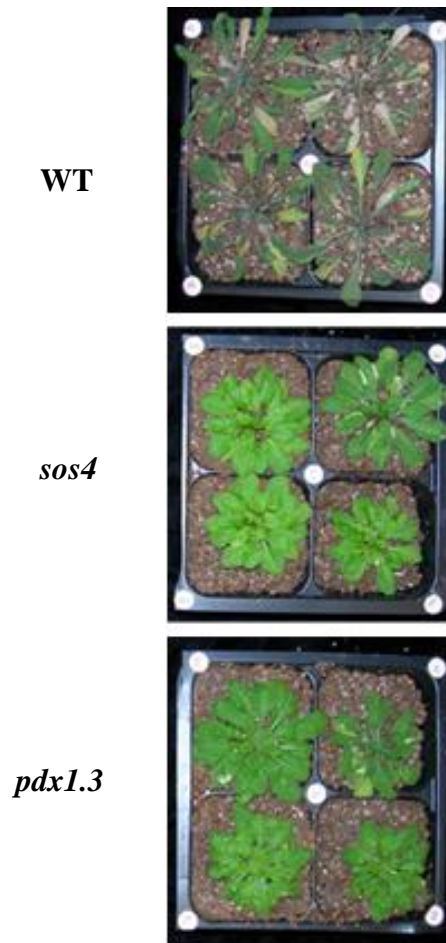

**Supplemental Figure S1.** Response of *Arabidopsis sos4* and *pdx1.3* mutant lines and *A. thaliana* Col-0 (WT) to drought conditions. Plants of each mutant line and the wild type were randomly arranged in a growth chamber at 20°C and watered once a week for three weeks. After this period watering was stopped in half of the plants. Picture only shows plants that were under drought conditions.
